# Supplementary material for: In situmodification of metal electrode by integrated microbial corrosion and microbial mineralization usingShewanella oneidensisfor efficient oxygen evolution
Source: Royal Society of Chemistry journal article supplement (doi:10.1039/d2cy01981g), 2023-01-01
Supplement: d2cy01981g1.pdf [file d2cy01981g1.pdf]

**Supporting Information for**

**In-Situ modification of metal electrode by integrated microbial corrosion and microbial mineralization using *Shewanella oneidensis* for efficient oxygen evolution**

**Si-Yuan Jia,<sup>ab</sup> Qian-Cen Shen,<sup>ab</sup> Yang-Chun Yong<sup>\*b</sup> and Jian-Li Mi<sup>\*a</sup>**

<sup>a</sup> Institute for Advanced Materials, School of Materials Science and Engineering, Jiangsu University, Zhenjiang 212013, China. Email: [jlmi@ujs.edu.cn](mailto:jlmi@ujs.edu.cn) (J.-L. Mi)

<sup>b</sup> Biofuels Institute, School of Environment and Safety Engineering, Jiangsu University, Zhenjiang 212013, China. Email: [yCYong@ujs.edu.cn](mailto:yCYong@ujs.edu.cn) (Y.-C. Yong)

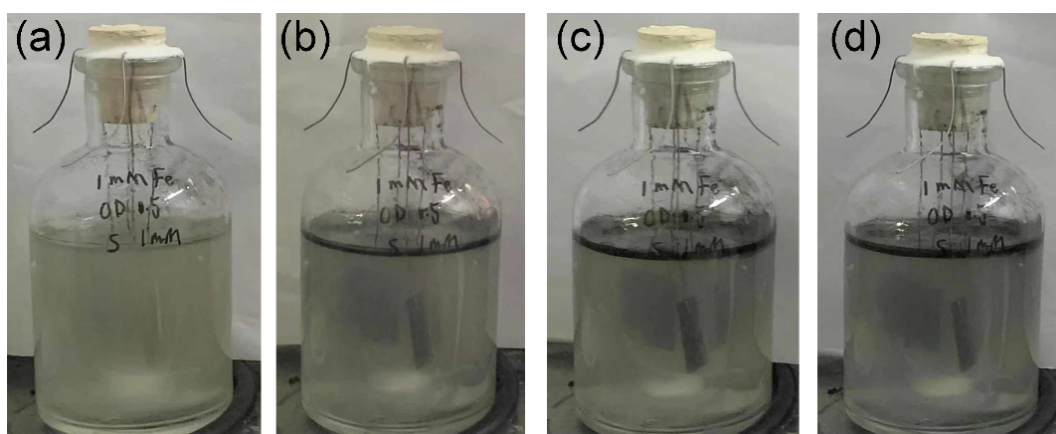

**Fig. S1** Photographs for the synthesis of Fe-S<sub>2</sub>/NF at different incubation time. (a) 0 day, (b) 1 day, (c) 3 days, and (d) 5 days.

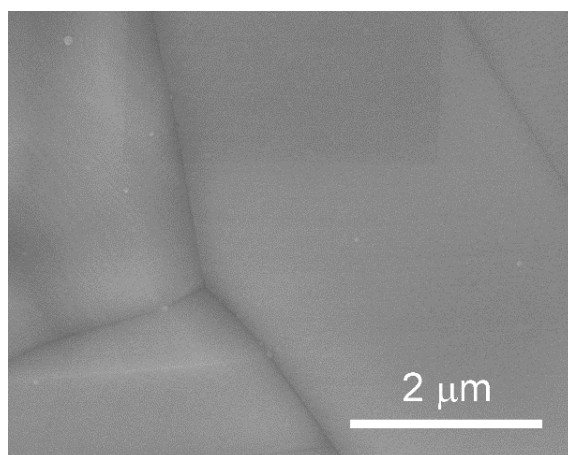

**Fig. S2** SEM image of bare NF.

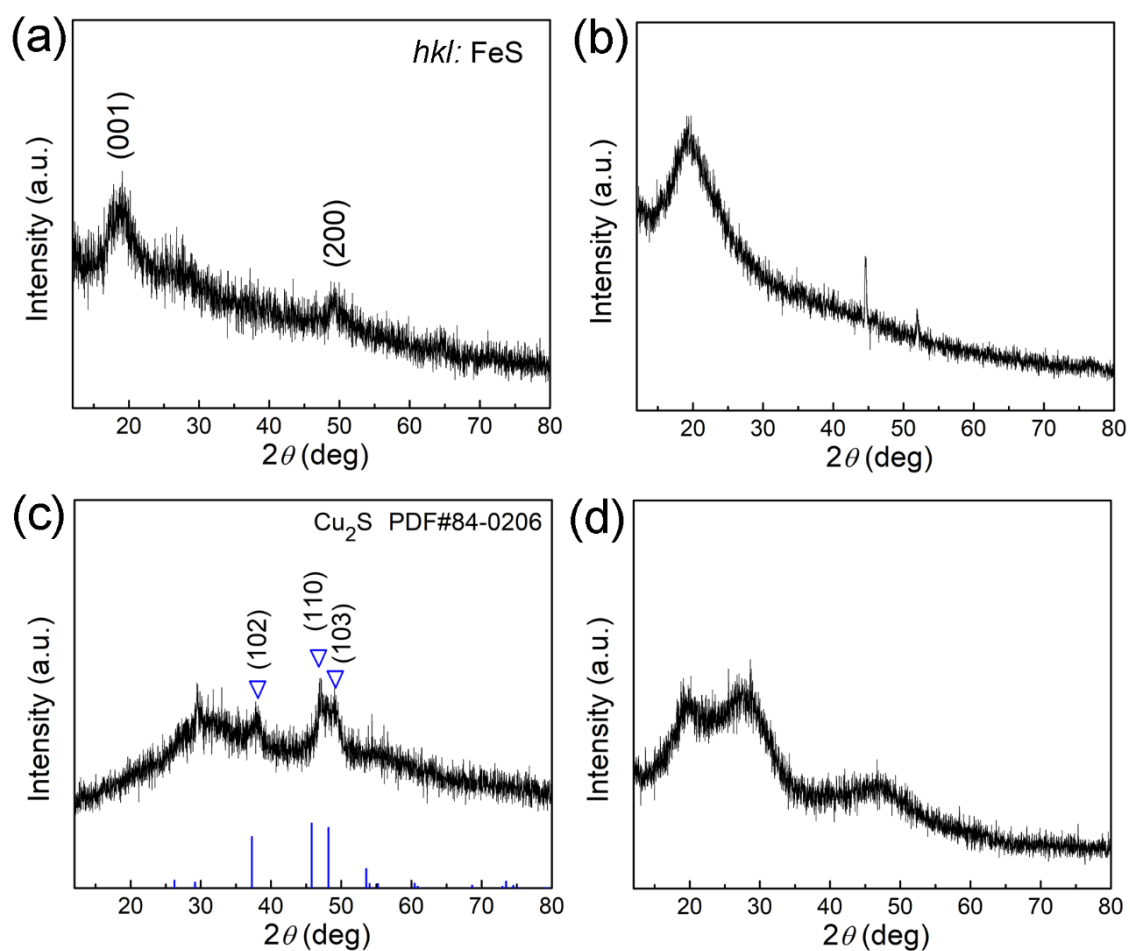

**Fig. S3** XRD patterns of the M-S<sub>2</sub> powders scratched from M-S<sub>2</sub>/NF. (a) Fe-S<sub>2</sub>, (b) Ni-S<sub>2</sub>, (c) Cu-S<sub>2</sub>, and (d) Cd-S<sub>2</sub>.

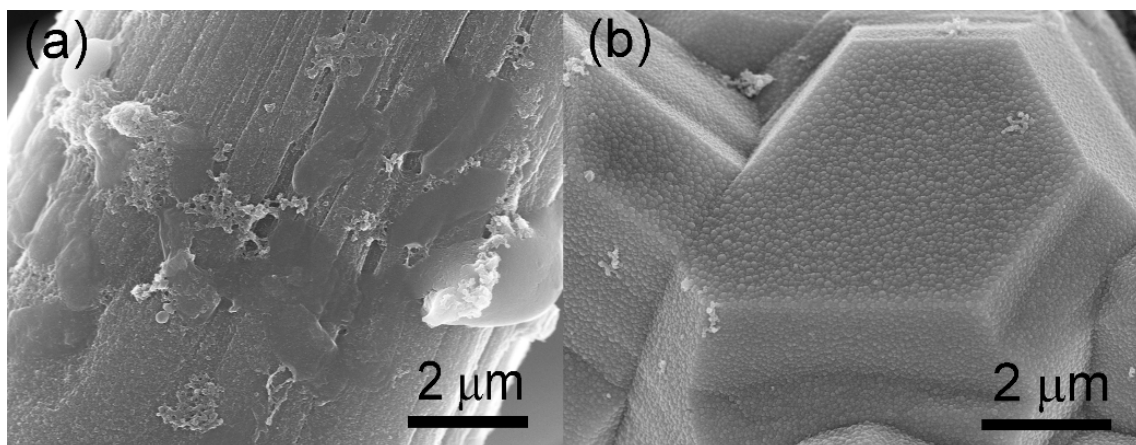

**Fig. S4** SEM images of (a) Fe-S<sub>2</sub>/CC, (b) Fe-S<sub>2</sub>/CF.

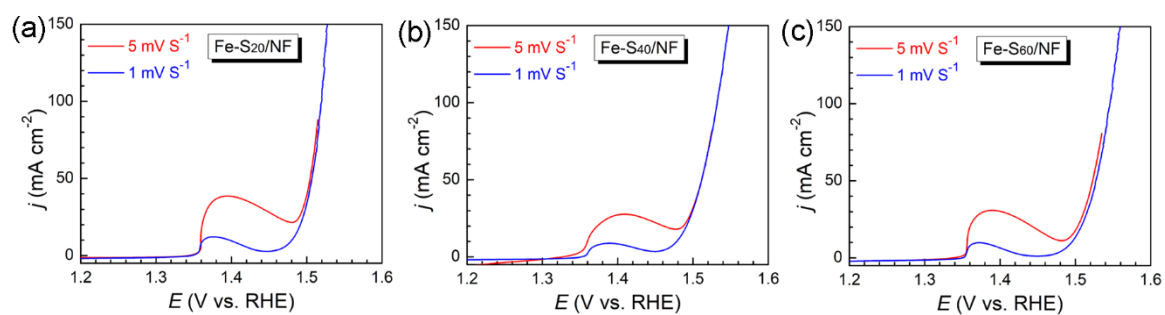

**Fig. S5** LSV curves recorded at sweep rates of 1 and 5 mV s<sup>-1</sup>. (a) Fe-S<sub>20</sub>/NF, (b) Fe-S<sub>40</sub>/NF, and (c) Fe-S<sub>60</sub>/NF.

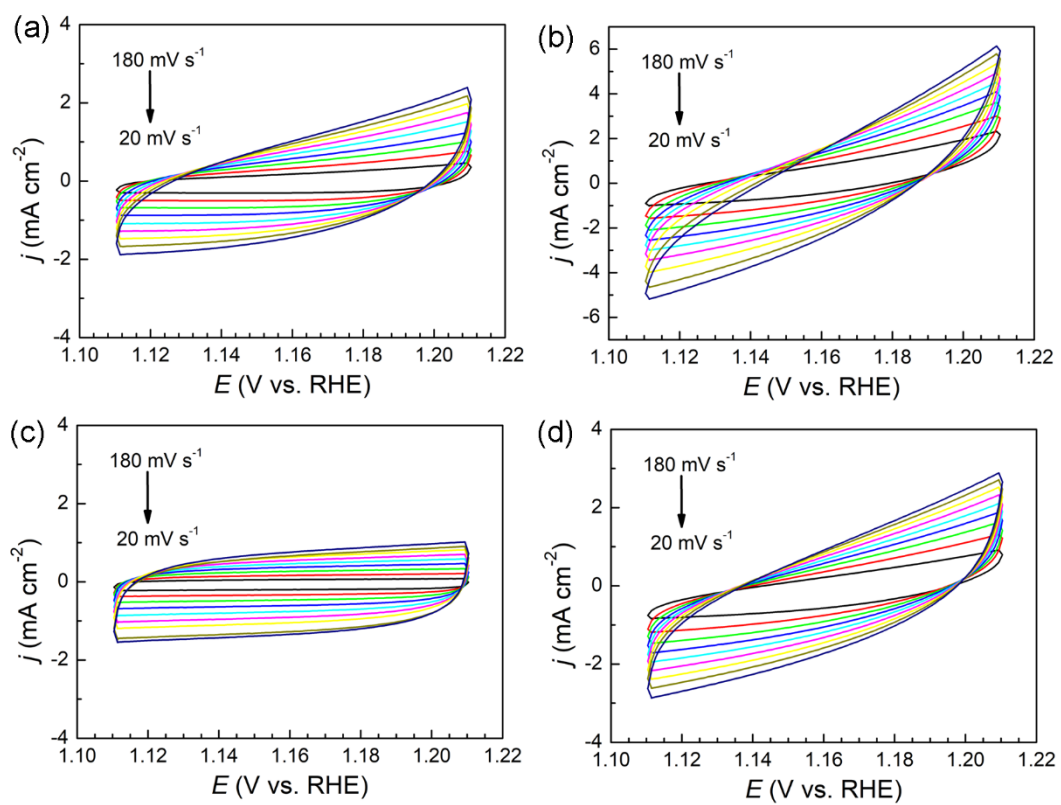

**Fig. S6** CV curves recorded across the non-Faradaic region from 1.11 to 1.21 V in different scan rates from 20 to 180  $\text{mV s}^{-1}$  of (a) Fe-S<sub>2</sub>/NF, (b) Ni-S<sub>2</sub>/NF, (c) Cu-S<sub>2</sub>/NF, and (d) Cd-S<sub>2</sub>/NF.

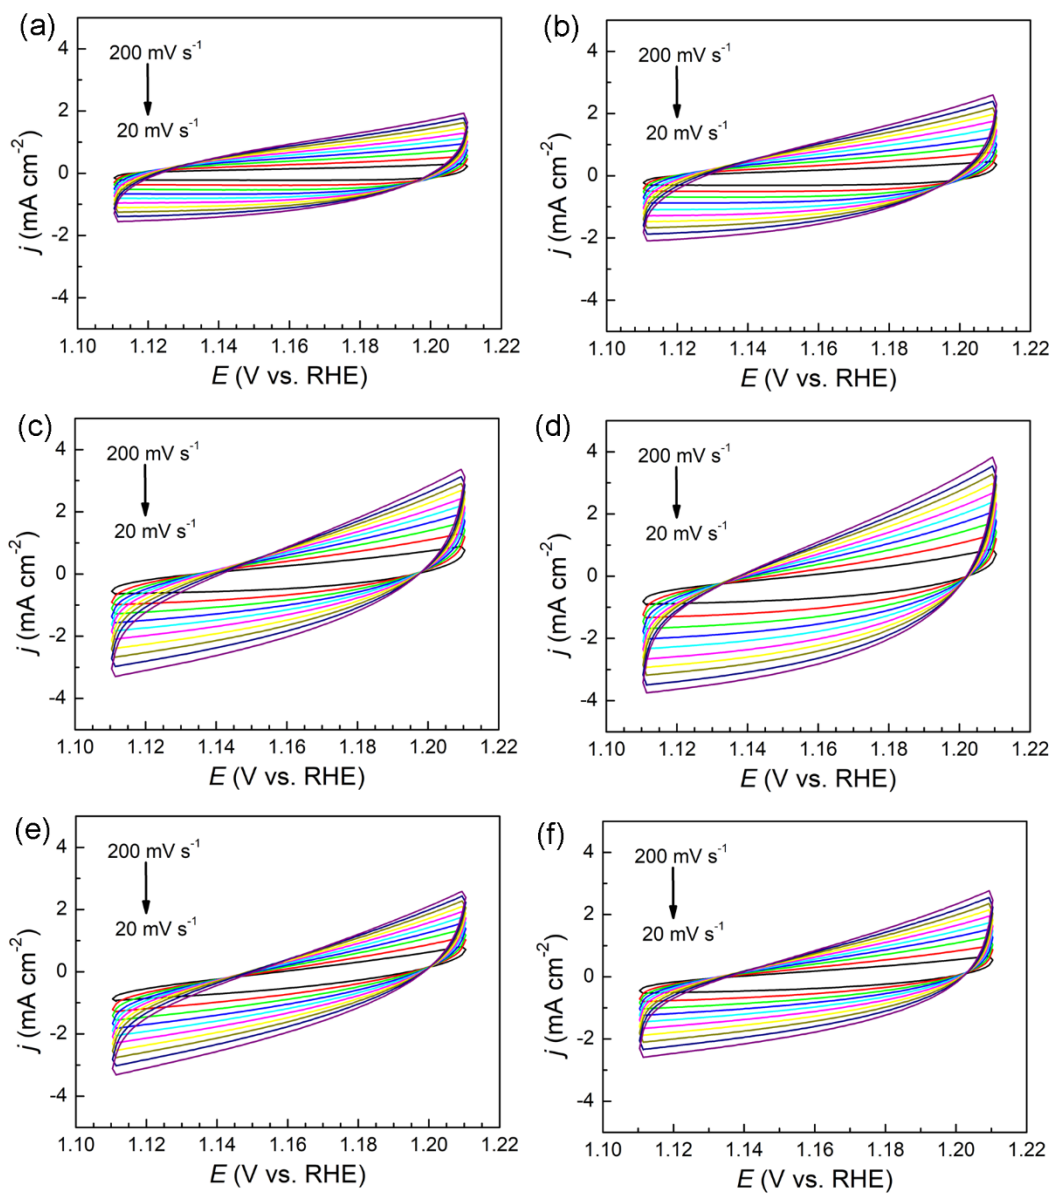

**Fig. S7** CV curves recorded across the non-Faradaic region from 1.11 to 1.21 V in different scan rates from 20 to 200 mV s<sup>-1</sup> of Fe-S<sub>x</sub>/NF. (a) x = 1, (b) x = 2, (c) x = 10, (d) x = 20, (e) x = 40, and (f) x = 100.

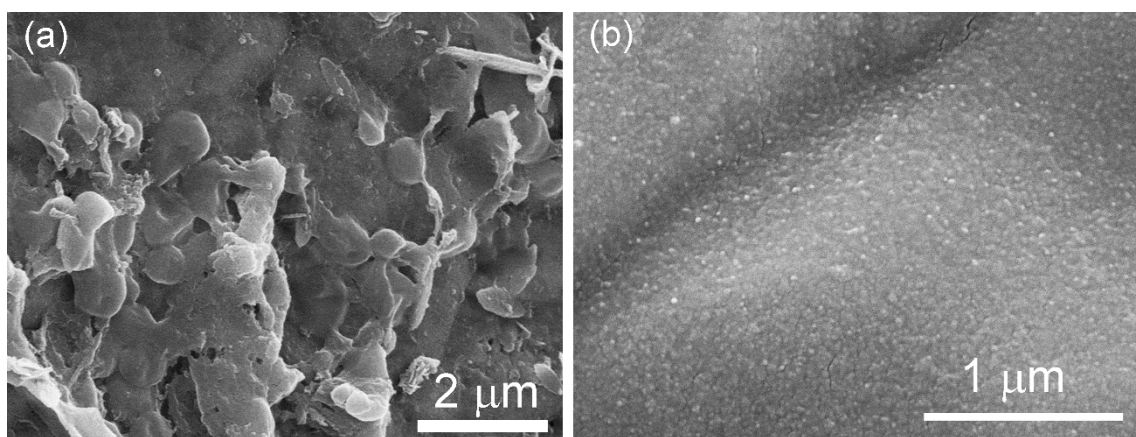

**Fig. S8** SEM images of (a) SW/NF and (b) Fe-S<sub>2</sub>\*/NF.
